# Supplementary material for: Alcohol Intake and Hypertensive Disorders of Pregnancy: A Negative Control Analysis in the ALSPAC Cohort
Source: PubMed Central journal article supplement (PMC9673719; doi:10.1161/jaha.121.025102), 2022-09-29
Supplement: JAH3-11-e025102-s001.pdf [file JAH3-11-e025102-s001.pdf]

## **SUPPLEMENTAL MATERIAL**

### **Data S1. Stratifying heavy drinking by binge drinking**

As described in the methods section, the heavy drinking category was further stratified by binge and non-binge drinkers. It has been shown that different forms of drinking are more frequent in different socioeconomic groups: those who drink little and often (for example, one glass of wine every night) and those who drink heavily once a week, are both heavy drinkers in our analysis. However, they have been shown in this sample (Table S5) to be characteristically different from one another; we deduced that this may have impacted on their underlying risk of outcome. There was a slight attenuation of the protective effect for heavy binge drinkers vs heavy non-binge drinkers when comparing with non-drinkers (as per the primary analysis), but the direction of effect was the same for all three outcomes and the intervals did not include one (Table S6).

## **Data S2. Sensitivity analysis findings**

### **Excluding participants with higher risk of HDP (diabetes, kidney disease or arthritis during pregnancy and non-singleton pregnancies)**

It has been shown that those who have diabetes, kidney disease, arthritis or non-singleton pregnancies have a higher risk of developing HDP. With the exchangeability in question between this group and those who did not experience any of these pregnancy complications, we performed a sensitivity analysis by which we excluded those women who had reported or were diagnosed with any of these risk factors for HDP. Other than slightly attenuating the effect, probably due to decreased power following their exclusion, both the crude and adjusted models concluded a reduction in relative risk, following alcohol intake in pregnancy, of both gestational hypertension and preeclampsia (adjusted relative risk ratio 0.84, 95% confidence interval 0.76 to 0.93, P-value<0.001 and 0.75, 0.59 to 0.96, P=0.021, respectively) (part (i), Figure 4).

### **Stratifying smoking during pregnancy**

It has been shown on multiple occasions that smoking during pregnancy is associated with a protective effect for preeclampsia (37, 38). We also observed this in ALSPAC, using smoking during pregnancy and risk of HDP to corroborate our findings for the partner's alcohol negative control analysis (Figure 2). Given that smoking is associated with drinking alcohol during pregnancy it was important to reduce any residual confounding not accounted for by using a binary smoking covariate. Having categorised smoking during pregnancy into average number per day (0, 1–4, 5–9, 10–14, 15–19, 20–29 and 30+), we observed no difference in effect from the model that adjusted for binary smoking during pregnancy (any or none) (adjusted odds ratio 0.85, 95% confidence interval 0.78 to 0.92, P-value<0.001) (part (ii), Figure 4).

### **Excluding respondent's post-20 weeks' gestation**

Given the diagnosis of gestational hypertension or preeclampsia occurs at 20 weeks' gestation or later, we considered the potential for knowledge of the outcome to have influenced reporting of the exposure, had the questionnaire been filled out after a diagnosis could have been made. With this in mind, we restricted the analysis to those who had filled in the questionnaire prior to 20 weeks' gestation (thus excluding responses from the postpartum questionnaire regarding drinking habits in the last two months of pregnancy) (part (i) Figure 4). The protective effect persisted in both the logistic and multinomial models having restricted to participants responding prior to 20 weeks' gestation (adjusted relative risk ratio 0.85, 95% confidence interval 0.76 to 0.95, P-value=0.003 and 0.72, 0.54 to 0.95, P=0.020, for gestational hypertension and preeclampsia, respectively).

### **Excluding abstainers prior to pregnancy**

It has been shown that those who abstain from alcohol outside of pregnancy are characteristically different and have exhibited different risks of morbidity and mortality compared with their drinking counterparts (32, 33). With the exchangeability in question between this group and those who did not abstain before pregnancy and their risk of the outcome, we performed a sensitivity analysis by which we excluded those women who had reported to have abstained from alcohol prior to pregnancy. Other than slightly attenuating the effect, probably due to decreased power following their exclusion, both the crude and adjusted models concluded a reduction in relative risk, following alcohol intake in pregnancy, of both gestational hypertension and preeclampsia (adjusted relative risk ratio 0.86, 95% confidence interval 0.78 to 0.95, P-value=0.001 and 0.76, 0.60 to 0.95, P=0.019, respectively) (part (iv), Figure 4).

Table S1. Summary of the variables in the full ALSPAC cohort used in the complete case (primary) analysis ( $n=15,442$ ), those in the complete case cohort ( $n=8,999$ ) and excluded, incomplete cases for exposure, outcomes, and covariates.

| Characteristic                    | Categories               | Available data<br>( $n = 15,442$ )<br>$n$ (%) | Categorical data<br>( $n = 15,442$ )<br>$n$ (%) | Complete records<br>( $n = 8,999$ )<br>$n$ (%) | Records with incomplete data<br>$n$ | Excluded<br>$n$ (%) |
|-----------------------------------|--------------------------|-----------------------------------------------|-------------------------------------------------|------------------------------------------------|-------------------------------------|---------------------|
| Maternal alcohol use in pregnancy | Non-drinker              | 12,373 (80)                                   | 3,194 (26)                                      | 2,415 (27)                                     | 3,030                               | 679 (22)            |
|                                   | Low-to-moderate          |                                               | 6,439 (52)                                      | 4,696 (52)                                     |                                     | 1,569 (52)          |
|                                   | Heavy                    |                                               | 2,740 (22)                                      | 1,888 (21)                                     |                                     | 782 (26)            |
| Maternal age                      | Under 25                 | 13,897 (90)                                   | 3,337 (24)                                      | 1,719 (19)                                     | 4,554                               | 1,563 (34)          |
|                                   | 25 and over              |                                               | 10,560 (76)                                     | 7,280 (81)                                     |                                     | 2,991 (66)          |
| Maternal body mass index (BMI)    | Underweight              | 11,524 (75)                                   | 577 (5)                                         | 425 (5)                                        | 2,181                               | 141 (7)             |
|                                   | Normal                   |                                               | 8,562 (74)                                      | 6,767 (75)                                     |                                     | 1,572 (73)          |
|                                   | Overweight               |                                               | 1,733 (15)                                      | 1,355 (15)                                     |                                     | 316 (15)            |
|                                   | Obese                    |                                               | 652 (6)                                         | 452 (5)                                        |                                     | 152 (6)             |
| Maternal smoking before pregnancy | Non-smoker               | 13,193 (85)                                   | 8,723 (66)                                      | 6,121 (68)                                     | 3,850                               | 2,344 (61)          |
|                                   | Smoker                   |                                               | 4,470 (34)                                      | 2,878 (32)                                     |                                     | 1,506 (39)          |
| Maternal smoking during pregnancy | Non-smoker               | 11,994 (78)                                   | 8,309 (69)                                      | 6,703 (75)                                     | 2,651                               | 1,330 (50)          |
|                                   | Smoker                   |                                               | 3,685 (31)                                      | 2,296 (25)                                     |                                     | 1,321 (50)          |
| Maternal parity                   | Nulliparous              | 12,960 (84)                                   | 5,804 (45)                                      | 4,006 (45)                                     | 3,617                               | 1,614 (45)          |
|                                   | Multiparous              |                                               | 7,156 (55)                                      | 4,993 (55)                                     |                                     | 2,003 (55)          |
| Maternal ethnicity                | White                    | 12,251 (79)                                   | 11,909 (97)                                     | 8,834 (98)                                     | 2,908                               | 2,735 (94)          |
|                                   | Non-white                |                                               | 342 (3)                                         | 165 (2)                                        |                                     | 173 (6)             |
| Maternal educational attainment   | A levels or less         | 12,321 (80)                                   | 10,736 (87)                                     | 7,754 (86)                                     | 2,978                               | 2,687 (90)          |
|                                   | Degree                   |                                               | 1,585 (13)                                      | 1,245 (14)                                     |                                     | 291 (10)            |
| Maternal marital status           | Not currently married    | 13,548 (88)                                   | 3,523 (26)                                      | 2,000 (22)                                     | 4,205                               | 1,448 (34)          |
|                                   | Married                  |                                               | 10,025 (74)                                     | 6,999 (78)                                     |                                     | 2,762 (66)          |
| Maternal HDP                      | Normotensive             | 13,681 (89)                                   | 11,447 (84)                                     | 7,509 (83)                                     | 4,338                               | 3,594 (83)          |
|                                   | Gestational hypertension |                                               | 1,937 (14)                                      | 1,308 (15)                                     |                                     | 629 (15)            |
|                                   | Preeclampsia             |                                               | 297 (2)                                         | 182 (2)                                        |                                     | 115 (3)             |

Table S2. Summary of the variables in the full ALSPAC cohort used in the negative control analysis ( $n=15,442$ ), those in the negative control cohort ( $n=5,376$ ) and excluded, incomplete cases for exposure, outcomes, and covariates.

| Characteristic                      | Categories               | Available data<br>( $n = 15,442$ )<br>$n$ (%) | Categorical data<br>( $n = 15,442$ )<br>$n$ (%) | Complete records<br>( $n = 5,376$ )<br>$n$ (%) | Records with incomplete data<br>$n$ | Excluded<br>$n$ (%) |
|-------------------------------------|--------------------------|-----------------------------------------------|-------------------------------------------------|------------------------------------------------|-------------------------------------|---------------------|
| Partner alcohol intake in pregnancy | Non-drinker              | 10,380 (67)                                   | 268 (3)                                         | 141 (3)                                        | 3,885                               | 82 (2)              |
|                                     | Low-to-moderate          |                                               | 7,594 (73)                                      | 3,943 (73)                                     |                                     | 2,839 (73)          |
|                                     | Heavy                    |                                               | 2,518 (24)                                      | 1,292 (24)                                     |                                     | 964 (25)            |
| Partner age                         | Under 25                 | 8,146 (53)                                    | 941 (12)                                        | 527 (10)                                       | 1,597                               | 280 (18)            |
|                                     | 25 and over              |                                               | 7,205 (88)                                      | 4,849 (90)                                     |                                     | 1,317 (82)          |
| Partner body mass index (BMI)       | Underweight              | 12,451 (81)                                   | 1,504 (12)                                      | 247 (5)                                        | 5,915                               | 801 (14)            |
|                                     | Normal                   |                                               | 8,562 (69)                                      | 4,049 (75)                                     |                                     | 3,979 (67)          |
|                                     | Overweight               |                                               | 1,733 (14)                                      | 816 (15)                                       |                                     | 816 (14)            |
|                                     | Obese                    |                                               | 652 (5)                                         | 264 (5)                                        |                                     | 319 (5)             |
| Partner smoking during pregnancy    | Non-smoker               | 9,418 (61)                                    | 5,837 (62)                                      | 3,561 (66)                                     | 2,869                               | 1,551 (54)          |
|                                     | Smoker                   |                                               | 3,581 (38)                                      | 1,815 (34)                                     |                                     | 1,318 (46)          |
| Partner parity                      | Nulliparous              | 12,960 (84)                                   | 5,804 (45)                                      | 2,580 (48)                                     | 6,411                               | 2,646 (41)          |
|                                     | Multiparous              |                                               | 7,156 (55)                                      | 2,796 (52)                                     |                                     | 3,765 (59)          |
| Partner ethnicity                   | White                    | 9,746 (63)                                    | 9,459 (97)                                      | 5,291 (98)                                     | 3,197                               | 3,037 (95)          |
|                                     | Non-white                |                                               | 287 (3)                                         | 85 (2)                                         |                                     | 160 (5)             |
| Partner educational attainment      | A levels or less         | 9,803 (64)                                    | 7,892 (81)                                      | 4,145 (77)                                     | 3,254                               | 2,808 (86)          |
|                                     | Degree                   |                                               | 1,911 (19)                                      | 1,231 (23)                                     |                                     | 446 (14)            |
| Partner marital status              | Not currently married    | 13,548 (88)                                   | 3,523 (26)                                      | 950 (18)                                       | 6,999                               | 2,321 (33)          |
|                                     | Married                  |                                               | 10,025 (74)                                     | 4,426 (82)                                     |                                     | 4,678 (67)          |
| Maternal HDP                        | Normotensive             | 13,681 (89)                                   | 11,447 (84)                                     | 4,420 (82)                                     | 7,139                               | 6,043 (85)          |
|                                     | Gestational hypertension |                                               | 1,937 (14)                                      | 837 (16)                                       |                                     | 938 (13)            |
|                                     | Preeclampsia             |                                               | 297 (2)                                         | 119 (2)                                        |                                     | 158 (2)             |

Table S3. Predictors of being a complete case in available data for each maternal variable

| Characteristic                       | Category              | Crude OR (95%CI)    |
|--------------------------------------|-----------------------|---------------------|
| Maternal alcohol intake in pregnancy | Non-drinker           | 1.00 (referent)     |
|                                      | Low-to-moderate       | 0.84 (0.76 to 0.93) |
|                                      | Heavy                 | 0.70 (0.62 to 0.78) |
| Maternal age                         | Under 25              | 1.00 (referent)     |
|                                      | 25 and over           | 2.24 (2.07 to 2.43) |
| Maternal body mass index (BMI)       | Underweight           | 1.00 (referent)     |
|                                      | Normal                | 1.44 (1.18 to 1.75) |
|                                      | Overweight            | 1.46 (1.15 to 1.81) |
|                                      | Obese                 | 1.23 (0.94 to 1.62) |
| Maternal smoking before pregnancy    | Non-smoker            | 1.00 (referent)     |
|                                      | Smoker                | 0.73 (0.68 to 0.79) |
| Maternal smoking during pregnancy    | Non-smoker            | 1.00 (referent)     |
|                                      | Smoker                | 0.34 (0.31 to 0.37) |
| Maternal parity                      | Nulliparous           | 1.00 (referent)     |
|                                      | Multiparous           | 1.00 (0.93 to 1.08) |
| Maternal ethnicity                   | White                 | 1.00 (referent)     |
|                                      | Non-white             | 0.33 (0.27 to 0.41) |
| Maternal educational attainment      | A-levels or lower     | 1.00 (referent)     |
|                                      | University degree     | 1.48 (1.29 to 1.69) |
| Maternal marital status              | Not currently married | 1.00 (referent)     |
|                                      | Married               | 1.84 (1.70 to 1.99) |
| Maternal HDP                         | Normotensive          | 1.00 (referent)     |
|                                      | HDP                   | 0.92 (0.83 to 1.01) |

Table S4. Predictors of being a complete case in available data for each partner variable

| Characteristic                      | Category              | Crude OR (95%CI)    |
|-------------------------------------|-----------------------|---------------------|
| Partner alcohol intake in pregnancy | Non-drinker           | 1.00 (referent)     |
|                                     | Low-to-moderate       | 0.74 (0.57 to 0.96) |
|                                     | Heavy                 | 0.71 (0.54 to 0.93) |
| Partner age                         | Under 25              | 1.00 (referent)     |
|                                     | 25 and over           | 1.89 (1.63 to 2.21) |
| Partner body mass index (BMI)       | Underweight           | 1.00 (referent)     |
|                                     | Normal                | 1.31 (1.18 to 1.46) |
|                                     | Overweight            | 1.28 (1.12 to 1.47) |
|                                     | Obese                 | 1.19 (0.99 to 1.43) |
| Partner smoking during pregnancy    | Non-smoker            | 1.00 (referent)     |
|                                     | Smoker                | 0.62 (0.57 to 0.68) |
| Partner parity                      | Nulliparous           | 1.00 (referent)     |
|                                     | Multiparous           | 0.76 (0.70 to 0.81) |
| Partner ethnicity                   | White                 | 1.00 (referent)     |
|                                     | Non-white             | 0.38 (0.30 to 0.48) |
| Partner educational attainment      | A-levels or lower     | 1.00 (referent)     |
|                                     | University degree     | 1.81 (1.62 to 2.04) |
| Partner marital status              | Not currently married | 1.00 (referent)     |
|                                     | Married               | 2.21 (2.04 to 2.39) |
| Maternal HDP                        | Normotensive          | 1.00 (referent)     |
|                                     | HDP                   | 1.16 (1.06 to 1.27) |



Table S5. Characteristics of normotensive participants ( $n=7,509$ ) compared to participants with HDP ( $n=1,490$ )

|                                                     | Normotensive | Hypertensive disorder<br>of pregnancy |
|-----------------------------------------------------|--------------|---------------------------------------|
|                                                     | 7,509        | 1,490                                 |
| <b>Age at delivery</b>                              |              |                                       |
| Mean, years (SD*)                                   | 28.6 (4.7)   | 28.3 (4.9)                            |
| <b>BMI† pre-pregnancy</b>                           |              |                                       |
| Mean, kg/m <sup>2</sup> (SD*)                       | 22.5 (3.3)   | 24.7 (4.9)                            |
| <b>Smoking</b>                                      |              |                                       |
| Any pre-pregnancy, $n$ (%)                          | 2,456 (32.7) | 422 (28.3)                            |
| Any during pregnancy, $n$ (%)                       | 1,995 (26.6) | 301 (20.2)                            |
| <b>Parity (18 weeks' gestation)</b>                 |              |                                       |
| Multiparous, $n$ (%)                                | 4,384 (58.4) | 609 (40.9)                            |
| <b>Ethnicity (32 weeks' gestation)</b>              |              |                                       |
| Non-white, $n$ (%)                                  | 146 (1.9)    | 19 (1.3)                              |
| <b>Educational attainment (32 weeks' gestation)</b> |              |                                       |
| University degree, $n$ (%)                          | 1,040 (13.9) | 205 (13.8)                            |
| <b>Marital status</b>                               |              |                                       |
| Married, $n$ (%)                                    | 5,839 (77.8) | 1,160 (77.9)                          |

\* Standard deviation

† Body mass index

Table S6. Maternal alcohol intake during pregnancy and HDP in complete case cohort (n=8,999)

| Maternal outcome                                   | Maternal alcohol intake during pregnancy |                          |               | Unadjusted model       |                | Adjusted model            |                |
|----------------------------------------------------|------------------------------------------|--------------------------|---------------|------------------------|----------------|---------------------------|----------------|
|                                                    | Heavy<br>n (%)                           | Low-to-moderate<br>n (%) | None<br>n (%) | OR*<br>(95%CI)         | p-value        | OR*, †<br>(95%CI)         | p-value        |
| <b>HDP – n complete cases</b>                      | <b>1,888</b>                             | <b>4,696</b>             | <b>2,415</b>  | -                      | -              | -                         | -              |
| Yes                                                | 259<br>(13.7)                            | 765<br>(16.3)            | 466<br>(19.3) | 0.82<br>(0.75 to 0.88) | <0.001         | 0.85<br>(0.78 to 0.92)    | <0.001         |
|                                                    |                                          |                          |               | <b>RR‡<br/>(95%CI)</b> | <b>p-value</b> | <b>RR‡, †<br/>(95%CI)</b> | <b>p-value</b> |
| <b>Gestational hypertension – n complete cases</b> | <b>1,888</b>                             | <b>4,696</b>             | <b>2,415</b>  | -                      | -              | -                         | -              |
| Yes                                                | 229<br>(12.1)                            | 681<br>(14.5)            | 398<br>(16.5) | 0.83<br>(0.76 to 0.91) | <0.001         | 0.86<br>(0.79 to 0.94)    | 0.001          |
| <b>Preeclampsia – n complete cases</b>             | <b>1,888</b>                             | <b>4,696</b>             | <b>2,415</b>  | -                      | -              | -                         | -              |
| Yes                                                | 30<br>(1.6)                              | 84<br>(1.8)              | 68<br>(2.8)   | 0.70<br>(0.56 to 0.87) | 0.001          | 0.74<br>(0.59 to 0.92)    | 0.007          |

\* Odds ratio generated using logistic regression

† Adjusted for covariates: maternal age at delivery, maternal body mass index (pre-pregnancy), pre-pregnancy smoking (binary), smoking during pregnancy (binary), parity (0, 1, 2 or ≥3), maternal ethnicity (white or non-white), maternal education (32 weeks' gestation) and marital status

‡ Relative risk ratio generated by multinomial logistic regression

Table S7. Maternal alcohol intake during pregnancy and HDP in negative control cohort (n=5,376)

| Maternal outcome                                   | Maternal alcohol intake during pregnancy |                          |               | Unadjusted model                        |                | Adjusted model                            |                | Mutually adjusted model                     |                |
|----------------------------------------------------|------------------------------------------|--------------------------|---------------|-----------------------------------------|----------------|-------------------------------------------|----------------|---------------------------------------------|----------------|
|                                                    | Heavy<br>n (%)                           | Low-to-moderate<br>n (%) | None<br>n (%) | OR*<br>(95%CI)                          | p-value        | OR* <sup>†</sup><br>(95%CI)               | p-value        | OR* <sup>†,§</sup><br>(95%CI)               | p-value        |
| <b>HDP – n complete cases</b>                      | <b>1,030</b>                             | <b>2,872</b>             | <b>1,474</b>  | -                                       | -              | -                                         | -              | -                                           | -              |
| Yes                                                | 153<br>(14.9)                            | 493<br>(17.2)            | 310<br>(21.0) | 0.80<br>(0.72 to 0.89)                  | <0.001         | 0.84<br>(0.75 to 0.94)                    | 0.002          | 0.86<br>(0.77 to 0.96)                      | 0.008          |
|                                                    |                                          |                          |               | <b>RR<sup>‡</sup></b><br><b>(95%CI)</b> | <b>p-value</b> | <b>RR<sup>‡,†</sup></b><br><b>(95%CI)</b> | <b>p-value</b> | <b>RR<sup>‡,†,§</sup></b><br><b>(95%CI)</b> | <b>p-value</b> |
| <b>Gestational hypertension – n complete cases</b> | <b>1,030</b>                             | <b>2,872</b>             | <b>1,474</b>  | -                                       | -              | -                                         | -              | -                                           | -              |
| Yes                                                | 137<br>(13.3)                            | 434<br>(15.1)            | 266<br>(18.1) | 0.82<br>(0.74 to 0.92)                  | <0.001         | 0.85<br>(0.76 to 0.96)                    | 0.007          | 0.87<br>(0.78 to 0.98)                      | 0.026          |
| <b>Preeclampsia – n complete cases</b>             | <b>1,030</b>                             | <b>2,872</b>             | <b>1,474</b>  | -                                       | -              | -                                         | -              | -                                           | -              |
| Yes                                                | 16<br>(1.6)                              | 59 (2.1)                 | 44<br>(3.0)   | 0.69<br>(0.52 to 0.90)                  | 0.007          | 0.74<br>(0.55 to 0.98)                    | 0.033          | 0.75<br>(0.56 to 0.99)                      | 0.045          |

\* Odds ratio generated using logistic regression

<sup>†</sup> Adjusted for covariates: maternal age at delivery, maternal body mass index (pre-pregnancy), pre-pregnancy smoking (binary), smoking during pregnancy (binary), parity (0, 1, 2 or ≥3), maternal ethnicity (white or non-white), maternal education (32 weeks' gestation) and marital status

<sup>‡</sup> Relative risk ratio generated by multinomial logistic regression

<sup>§</sup> Mutually adjusted for covariates plus partner's alcohol intake during pregnancy

Table S8. Characteristics of participants by categories of alcohol intake during pregnancy, heavy stratified by binge and non-binge

|                                                     | None         | Low-to-moderate | Heavy non-binge | Heavy binge  |
|-----------------------------------------------------|--------------|-----------------|-----------------|--------------|
|                                                     | 2,415        | 4,696           | 348             | 1,540        |
| <b>Age at delivery</b>                              |              |                 |                 |              |
| Mean, years (SD <sup>*</sup> )                      | 27.7 (4.7)   | 28.9 (4.6)      | 30.4 (4.7)      | 28.4 (4.9)   |
| <b>BMI<sup>†</sup> (pre-pregnancy)</b>              |              |                 |                 |              |
| Mean, kg/m <sup>2</sup> (SD <sup>*</sup> )          | 23.0 (4.0)   | 22.7 (3.6)      | 22.5 (3.3)      | 23.2 (3.0)   |
| <b>Smoking</b>                                      |              |                 |                 |              |
| Any pre-pregnancy, <i>n</i> (%)                     | 705 (29.2)   | 1,299 (27.7)    | 117 (33.6)      | 757 (49.2)   |
| Any during pregnancy, <i>n</i> (%)                  | 552 (22.9)   | 991 (21.1)      | 91 (26.2)       | 662 (43.0)   |
| <b>Parity (18 weeks' gestation)</b>                 |              |                 |                 |              |
| Multiparous, <i>n</i> (%)                           | 1,280 (53.0) | 2,589 (55.1)    | 199 (57.2)      | 925 (60.1)   |
| <b>Ethnicity (32 weeks' gestation)</b>              |              |                 |                 |              |
| Non-white, <i>n</i> (%)                             | 61 (2.5)     | 80 (1.7)        | 4 (1.2)         | 20 (1.3)     |
| <b>Educational attainment (32 weeks' gestation)</b> |              |                 |                 |              |
| University degree, <i>n</i> (%)                     | 232 (9.6)    | 792 (16.9)      | 102 (29.3)      | 119 (7.7)    |
| <b>Marital status</b>                               |              |                 |                 |              |
| Married, <i>n</i> (%)                               | 1,904 (78.8) | 3,792 (80.8)    | 273 (78.5)      | 1,030 (66.9) |

<sup>\*</sup>Standard deviation

<sup>†</sup>Body mass index

Table S9. Maternal alcohol intake during pregnancy and HDP, expanding heavy drinking to binge and non-binge ( $n=8,999$ ), including alcohol exposure as a categorical exposure

| Type of drinking | Maternal outcome         | Unadjusted model       |                 | Adjusted model              |                 |
|------------------|--------------------------|------------------------|-----------------|-----------------------------|-----------------|
|                  |                          | OR*<br>(95%CI)         | <i>p</i> -value | OR* <sup>†</sup><br>(95%CI) | <i>p</i> -value |
|                  | HDP<br><i>n</i> (%)      | -                      | -               | -                           | -               |
| None             | 466/2,415<br>(19.3)      | 1.00 (reference)       | -               | 1.00 (reference)            | -               |
| Low-to-moderate  | 765/4,696<br>(16.3)      | 0.81<br>(0.72 to 0.92) | 0.002           | 0.85<br>(0.74 to 0.97)      | 0.019           |
| Heavy non-binge  | 43/348<br>(12.4)         | 0.59<br>(0.42 to 0.82) | 0.002           | 0.64<br>(0.45 to 0.90)      | 0.012           |
| Heavy binge      | 216/1,540<br>(14.0)      | 0.68<br>(0.57 to 0.81) | <0.001          | 0.73<br>(0.60 to 0.88)      | 0.001           |
|                  |                          | RR*<br>(95%CI)         | <i>p</i> -value | RR* <sup>‡</sup><br>(95%CI) | <i>p</i> -value |
|                  | Gestational hypertension |                        |                 |                             |                 |
| None             | 398/2,415<br>(16.5)      | 1.00 (reference)       | -               | 1.00 (reference)            | -               |
| Low-to-moderate  | 681/4,696<br>(14.5)      | 0.85<br>(0.74 to 0.97) | 0.017           | 0.88<br>(0.77 to 1.02)      | 0.083           |
| Heavy non-binge  | 36/348<br>(10.3)         | 0.58<br>(0.40 to 0.83) | 0.003           | 0.62<br>(0.43 to 0.90)      | 0.013           |
| Heavy binge      | 193/1,540<br>(12.5)      | 0.71<br>(0.59 to 0.86) | <0.001          | 0.76<br>(0.63 to 0.92)      | 0.006           |
|                  | Preeclampsia             | -                      | -               | -                           | -               |
| None             | 68/2,415<br>(2.8)        | 1.00 (reference)       | -               | 1.00 (reference)            | -               |
| Low-to-moderate  | 84/4,696<br>(1.8)        | 0.61<br>(0.44 to 0.85) | 0.003           | 0.66<br>(0.48 to 0.93)      | 0.017           |
| Heavy non-binge  | 7/348<br>(2.0)           | 0.66<br>(0.30 to 1.45) | 0.297           | 0.74<br>(0.33 to 1.66)      | 0.463           |
| Heavy binge      | 23/1,540<br>(1.5)        | 0.50<br>(0.31 to 0.80) | 0.004           | 0.54<br>(0.33 to 0.87)      | 0.013           |

\* Odds ratio generated using logistic regression

<sup>†</sup> Adjusted for covariates: maternal age at delivery, maternal body mass index (pre-pregnancy), pre-pregnancy smoking (binary), smoking during pregnancy (binary), parity (0, 1, 2 or  $\geq 3$ ), maternal ethnicity (white or non-white), maternal education (32 weeks' gestation) and marital status

<sup>‡</sup> Relative risk ratio generated by multinomial logistic regression

Table S10. Partner's alcohol intake during pregnancy and maternal HDP in negative control cohort (n=5,376)

| Maternal outcome                                   | Partner's alcohol intake during pregnancy |                          |               | Unadjusted model                 |                | Adjusted model                     |                | Mutually adjusted model            |                |
|----------------------------------------------------|-------------------------------------------|--------------------------|---------------|----------------------------------|----------------|------------------------------------|----------------|------------------------------------|----------------|
|                                                    | Heavy<br>n (%)                            | Low-to-moderate<br>n (%) | None<br>n (%) | OR*<br>(95%CI)                   | p-value        | OR* <sup>†</sup><br>(95%CI)        | p-value        | OR* <sup>†,§</sup><br>(95%CI)      | p-value        |
| <b>HDP – n complete cases</b>                      | 1,292                                     | 3,943                    | 141           | -                                | -              | -                                  | -              | -                                  | -              |
| Yes                                                | 196<br>(15.2)                             | 728<br>(18.5)            | 32<br>(22.7)  | 0.79<br>(0.68 to 0.92)           | 0.002          | 0.79<br>(0.67 to 0.92)             | 0.003          | 0.82<br>(0.70 to 0.97)             | 0.018          |
|                                                    |                                           |                          |               | <b>RR<sup>‡</sup></b><br>(95%CI) | <b>p-value</b> | <b>RR<sup>‡,§</sup></b><br>(95%CI) | <b>p-value</b> | <b>RR<sup>‡,§</sup></b><br>(95%CI) | <b>p-value</b> |
| <b>Gestational hypertension – n complete cases</b> | 1,292                                     | 3,943                    | 141           | -                                | -              | -                                  | -              | -                                  | -              |
| Yes                                                | 168<br>(13.0)                             | 642<br>(16.3)            | 27<br>(19.2)  | 0.78<br>(0.66 to 0.91)           | 0.002          | 0.78<br>(0.66 to 0.92)             | 0.003          | 0.81<br>(0.68 to 0.96)             | 0.014          |
| <b>Preeclampsia – n complete cases</b>             | 1,292                                     | 3,943                    | 141           | -                                | -              | -                                  | -              | -                                  | -              |
| Yes                                                | 28<br>(2.2)                               | 86 (2.2)                 | 5 (3.6)       | 0.87<br>(0.59 to 1.29)           | 0.494          | 0.86<br>(0.58 to 1.30)             | 0.479          | 0.95<br>(0.63 to 1.43)             | 0.794          |

\* Odds ratio generated using logistic regression

<sup>†</sup> Adjusted for covariates: partner's age at delivery, partner's body mass index (pre-pregnancy), pre-pregnancy smoking (binary), smoking during pregnancy (binary), parity (0, 1, 2 or ≥3), partner's ethnicity (white or non-white), partner's education (32 weeks' gestation) and marital status

<sup>‡</sup> Relative risk ratio generated by multinomial logistic regression

<sup>§</sup> Mutually adjusted for covariates plus maternal alcohol intake during pregnancy

Table S11. Maternal smoking during pregnancy and HDP in complete case cohort (n=8,999)

| Maternal outcome                                   | Maternal smoking during pregnancy |                 | Unadjusted model           |         | Adjusted model               |         |
|----------------------------------------------------|-----------------------------------|-----------------|----------------------------|---------|------------------------------|---------|
|                                                    | Any<br>n (%)                      | None<br>n (%)   | OR*<br>(95%CI)             | p-value | OR <sup>†,‡</sup><br>(95%CI) | p-value |
| <b>HDP – n complete cases</b>                      | <b>2,296</b>                      | <b>6,703</b>    | -                          | -       | -                            | -       |
| Yes                                                | 301<br>(13.1)                     | 1,189<br>(17.7) | 0.70<br>(0.61 to 0.80)     | <0.001  | 0.67<br>(0.53 to 0.86)       | 0.001   |
|                                                    |                                   |                 | RR <sup>‡</sup><br>(95%CI) | p-value | RR <sup>‡,‡</sup><br>(95%CI) | p-value |
| <b>Gestational hypertension – n complete cases</b> | <b>2,296</b>                      | <b>6,703</b>    | -                          | -       | -                            | -       |
| Yes                                                | 271<br>(11.8)                     | 1,037<br>(15.5) | 0.72<br>(0.63 to 0.83)     | <0.001  | 0.72<br>(0.56 to 0.93)       | 0.011   |
| <b>Preeclampsia – n complete cases</b>             | <b>2,296</b>                      | <b>6,703</b>    | -                          | -       | -                            | -       |
| Yes                                                | 30<br>(1.3)                       | 152<br>(2.3)    | 0.55<br>(0.37 to 0.81)     | 0.003   | 0.41<br>(0.23 to 0.74)       | 0.003   |

\* Odds ratio generated using logistic regression

† Adjusted for covariates: maternal age at delivery, maternal body mass index (pre-pregnancy), pre-pregnancy smoking (binary), smoking during pregnancy (binary), parity (0, 1, 2 or ≥3), maternal ethnicity (white or non-white), maternal education (32 weeks' gestation) and marital status

‡ Relative risk ratio generated by multinomial logistic regression

Table S12. Maternal smoking during pregnancy and HDP in negative control cohort (n=5,376)

| Maternal outcome                                   | Maternal smoking during pregnancy |               | Unadjusted model           |         | Adjusted model               |         | Mutually adjusted model         |         |
|----------------------------------------------------|-----------------------------------|---------------|----------------------------|---------|------------------------------|---------|---------------------------------|---------|
|                                                    | Any<br>n (%)                      | None<br>n (%) | OR*<br>(95%CI)             | p-value | OR* <sup>†</sup><br>(95%CI)  | p-value | OR* <sup>†,‡,§</sup><br>(95%CI) | p-value |
| <b>HDP – n complete cases</b>                      | 1,169                             | 4,207         | -                          | -       | -                            | -       | -                               | -       |
| Yes                                                | 159<br>(13.6)                     | 797<br>(18.9) | 0.67<br>(0.56 to 0.81)     | <0.001  | 0.64<br>(0.52 to 0.79)       | <0.001  | 0.66<br>(0.53 to 0.81)          | <0.001  |
|                                                    |                                   |               | RR <sup>‡</sup><br>(95%CI) | p-value | RR <sup>‡,†</sup><br>(95%CI) | p-value | RR <sup>‡,†,§</sup><br>(95%CI)  | p-value |
| <b>Gestational hypertension – n complete cases</b> | 1,169                             | 4,207         | -                          | -       | -                            | -       | -                               | -       |
| Yes                                                | 147<br>(12.6)                     | 690<br>(16.4) | 0.72<br>(0.59 to 0.87)     | 0.001   | 0.70<br>(0.57 to 0.86)       | 0.001   | 0.71<br>(0.57 to 0.89)          | 0.003   |
| <b>Preeclampsia – n complete cases</b>             | 1,169                             | 4,207         | -                          | -       | -                            | -       | -                               | -       |
| Yes                                                | 12 (1.0)                          | 107 (2.5)     | 0.38<br>(0.21 to 0.69)     | 0.002   | 0.30<br>(0.16 to 0.56)       | <0.001  | 0.32<br>(0.17 to 0.61)          | 0.001   |

\* Odds ratio generated using logistic regression

† Adjusted for covariates: maternal age at delivery, maternal body mass index (pre-pregnancy), pre-pregnancy smoking (binary), alcohol intake during pregnancy (none, low-to-moderate or heavy), parity (0, 1, 2 or ≥3), maternal ethnicity (white or non-white), maternal education (32 weeks' gestation) and marital status

‡ Relative risk ratio generated by multinomial logistic regression

§ Mutually adjusted for covariates plus partner's smoking during pregnancy



Table S13. Partner's smoking during pregnancy and maternal HDP in negative control cohort (n=5,376)

| Maternal outcome                                   | Partner's smoking during pregnancy |               | Unadjusted model           |         | Adjusted model               |         | Mutually adjusted model         |         |
|----------------------------------------------------|------------------------------------|---------------|----------------------------|---------|------------------------------|---------|---------------------------------|---------|
|                                                    | Any<br>n (%)                       | None<br>n (%) | OR*<br>(95%CI)             | p-value | OR* <sup>†</sup><br>(95%CI)  | p-value | OR* <sup>†,‡,§</sup><br>(95%CI) | p-value |
| <b>HDP – n complete cases</b>                      | 1,815                              | 3,561         | -                          | -       | -                            | -       | -                               | -       |
| Yes                                                | 298<br>(16.4)                      | 658<br>(18.5) | 0.87<br>(0.75 to 1.01)     | 0.062   | 0.86<br>(0.73 to 1.00)       | 0.056   | 0.97<br>(0.81 to 1.14)          | 0.682   |
|                                                    |                                    |               | RR <sup>‡</sup><br>(95%CI) | p-value | RR <sup>‡,‡</sup><br>(95%CI) | p-value | RR <sup>‡,‡,§</sup><br>(95%CI)  | p-value |
| <b>Gestational hypertension – n complete cases</b> | 1,815                              | 3,561         | -                          | -       | -                            | -       | -                               | -       |
| Yes                                                | 264<br>(14.6)                      | 573<br>(16.1) | 0.88<br>(0.75 to 1.03)     | 0.119   | 0.884<br>(0.75 to 1.05)      | 0.152   | 0.98<br>(0.82 to 1.17)          | 0.779   |
| <b>Preeclampsia – n complete cases</b>             | 1,815                              | 3,561         | -                          | -       | -                            | -       | -                               | -       |
| Yes                                                | 34 (1.9)                           | 85 (2.4)      | 0.77<br>(0.51 to 1.14)     | 0.193   | 0.67<br>(0.44 to 1.03)       | 0.067   | 0.89<br>(0.57 to 1.38)          | 0.606   |

\* Odds ratio generated using logistic regression

<sup>†</sup> Adjusted for covariates: partner's age at delivery, partner's body mass index (pre-pregnancy), pre-pregnancy smoking (binary), partner's alcohol intake during pregnancy (none, low-to-moderate or heavy), parity (0, 1, 2 or ≥3), partner's ethnicity (white or non-white), partner's education (32 weeks' gestation) and marital status

<sup>‡</sup> Relative risk ratio generated by multinomial logistic regression

<sup>§</sup> Mutually adjusted for covariates plus maternal smoking during pregnancy

Table S14. Characteristics of participants stratified by categories of beer intake, excluding those who report any wine intake.

|                                                     | No alcohol in pregnancy | Low-to-moderate beer intake in pregnancy | Heavy beer intake in pregnancy |
|-----------------------------------------------------|-------------------------|------------------------------------------|--------------------------------|
|                                                     | 2,415                   | 458                                      | 192                            |
| <b>Age at delivery</b>                              |                         |                                          |                                |
| Mean, years (SD <sup>*</sup> )                      | 27.7 (4.68)             | 27.6 (4.70)                              | 28.6 (5.1)                     |
| <b>BMI<sup>†</sup> (pre-pregnancy)</b>              |                         |                                          |                                |
| Mean, kg/m <sup>2</sup> (SD <sup>*</sup> )          | 23.0 (4.02)             | 23.0 (4.0)                               | 22.8 (3.1)                     |
| <b>Smoking</b>                                      |                         |                                          |                                |
| Any pre-pregnancy, <i>n</i> (%)                     | 705 (29.2)              | 220 (48.0)                               | 111 (57.8)                     |
| Any during pregnancy, <i>n</i> (%)                  | 552 (22.9)              | 191 (41.7)                               | 102 (53.1)                     |
| <b>Parity (18 weeks' gestation)</b>                 |                         |                                          |                                |
| Multiparous, <i>n</i> (%)                           | 1,280 (53.0)            | 240 (52.4)                               | 128 (66.7)                     |
| <b>Ethnicity (32 weeks' gestation)</b>              |                         |                                          |                                |
| Non-white, <i>n</i> (%)                             | 61 (2.5)                | 3 (0.7)                                  | 6 (3.1)                        |
| <b>Educational attainment (32 weeks' gestation)</b> |                         |                                          |                                |
| University degree, <i>n</i> (%)                     | 232 (9.6)               | 38 (8.3)                                 | 16 (8.3)                       |
| <b>Marital status</b>                               |                         |                                          |                                |
| Married, <i>n</i> (%)                               | 1,904 (78.8)            | 317 (69.2)                               | 110 (57.3)                     |

\* Standard deviation

† Body mass index

Table S15. Characteristics of participants stratified by categories of wine intake, excluding those who report any beer intake.

|                                                     | No alcohol in pregnancy | Low-to-moderate wine intake in pregnancy | Heavy wine intake in pregnancy |
|-----------------------------------------------------|-------------------------|------------------------------------------|--------------------------------|
|                                                     | 2,415                   | 1,152                                    | 231                            |
| <b>Age at delivery</b>                              |                         |                                          |                                |
| Mean, years (SD <sup>*</sup> )                      | 27.7 (4.68)             | 29.7 (4.3)                               | 30.9 (4.6)                     |
| <b>BMI<sup>†</sup> (pre-pregnancy)</b>              |                         |                                          |                                |
| Mean, kg/m <sup>2</sup> (SD <sup>*</sup> )          | 23.0 (4.02)             | 22.8 (3.4)                               | 22.6 (3.2)                     |
| <b>Smoking</b>                                      |                         |                                          |                                |
| Any pre-pregnancy, <i>n</i> (%)                     | 705 (29.2)              | 300 (26.0)                               | 81 (35.1)                      |
| Any during pregnancy, <i>n</i> (%)                  | 552 (22.9)              | 215 (18.7)                               | 62 (26.8)                      |
| <b>Parity (18 weeks' gestation)</b>                 |                         |                                          |                                |
| Multiparous, <i>n</i> (%)                           | 1,280 (53.0)            | 642 (55.7)                               | 147 (63.6)                     |
| <b>Ethnicity (32 weeks' gestation)</b>              |                         |                                          |                                |
| Non-white, <i>n</i> (%)                             | 61 (2.5)                | 14 (1.2)                                 | 1 (0.4)                        |
| <b>Educational attainment (32 weeks' gestation)</b> |                         |                                          |                                |
| University degree, <i>n</i> (%)                     | 232 (9.6)               | 235 (20.4)                               | 58 (25.1)                      |
| <b>Marital status</b>                               |                         |                                          |                                |
| Married, <i>n</i> (%)                               | 1,904 (78.8)            | 979 (85.0)                               | 192 (83.1)                     |

\* Standard deviation

† Body mass index

Table S16. Maternal beer intake during pregnancies and HDP restricted to those with beer and wine data available ( $n=3,065$ )

| Maternal outcome                                          | Maternal beer drinking |                                 |                      | Unadjusted model       |                 | Adjusted model          |                 |
|-----------------------------------------------------------|------------------------|---------------------------------|----------------------|------------------------|-----------------|-------------------------|-----------------|
|                                                           | Heavy<br><i>n</i> (%)  | Low-to-moderate<br><i>n</i> (%) | None<br><i>n</i> (%) | OR*<br>(95%CI)         | <i>p</i> -value | OR*†<br>(95%CI)         | <i>p</i> -value |
| <b>HDP</b> – <i>n</i> complete cases                      | <b>192</b>             | <b>458</b>                      | <b>2,415</b>         | -                      | -               | -                       | -               |
| Yes                                                       | 27<br>(14.1)           | 72<br>(15.7)                    | 466<br>(19.3)        | 0.81<br>(0.68 to 0.96) | 0.017           | 0.89<br>(0.74 to 1.07)  | 0.217           |
|                                                           |                        |                                 |                      | <b>RR‡</b><br>(95%CI)  | <i>p</i> -value | <b>RR‡,†</b><br>(95%CI) | <i>p</i> -value |
| <b>Gestational hypertension</b> – <i>n</i> complete cases | <b>192</b>             | <b>458</b>                      | <b>2,415</b>         | -                      | -               | -                       | -               |
| Yes                                                       | 24<br>(12.5)           | 64<br>(14.0)                    | 398<br>(16.5)        | 0.83<br>(0.69 to 1.00) | 0.049           | 0.92<br>(0.75 to 1.11)  | 0.378           |
| <b>Preeclampsia</b> – <i>n</i> complete cases             | <b>192</b>             | <b>458</b>                      | <b>2,415</b>         | -                      | -               | -                       | -               |
| Yes                                                       | 3<br>(1.6)             | 8<br>(1.8)                      | 68<br>(2.8)          | 0.67<br>(0.41 to 1.08) | 0.102           | 0.73<br>(0.44 to 1.20)  | 0.211           |

\* Odds ratio generated using logistic regression

† Adjusted for covariates: maternal age at delivery, maternal body mass index (pre-pregnancy), pre-pregnancy smoking (binary), smoking during pregnancy (binary), parity (0, 1, 2 or ≥3), maternal ethnicity (white or non-white), maternal education (≥32 weeks' gestation) and marital status

‡ Relative risk ratio generated by multinomial logistic regression

Table S17. Maternal wine intake during pregnancies and HDP restricted to those with beer and wine data available ( $n=3,065$ )

| Maternal outcome                                          | Maternal wine drinking |                                 |                      | Unadjusted model       |                       | Adjusted model           |                       |
|-----------------------------------------------------------|------------------------|---------------------------------|----------------------|------------------------|-----------------------|--------------------------|-----------------------|
|                                                           | Heavy<br><i>n</i> (%)  | Low-to-moderate<br><i>n</i> (%) | None<br><i>n</i> (%) | OR*<br>(95%CI)         | <i>p</i> -value       | OR*†<br>(95%CI)          | <i>p</i> -value       |
| <b>HDP – <i>n</i> complete cases</b>                      | <b>231</b>             | <b>1,152</b>                    | <b>2,415</b>         | -                      | -                     | -                        | -                     |
| Yes                                                       | 29<br>(12.6)           | 170<br>(14.8)                   | 466<br>(19.3)        | 0.75<br>(0.64 to 0.87) | <0.001                | 0.78<br>(0.67 to 0.92)   | 0.003                 |
|                                                           |                        |                                 |                      | <b>RR‡<br/>(95%CI)</b> | <b><i>p</i>-value</b> | <b>RR‡,†<br/>(95%CI)</b> | <b><i>p</i>-value</b> |
| <b>Gestational hypertension – <i>n</i> complete cases</b> | <b>231</b>             | <b>1,152</b>                    | <b>2,415</b>         | -                      | -                     | -                        | -                     |
| Yes                                                       | 27<br>(11.7)           | 152<br>(13.2)                   | 398<br>(16.5)        | 0.78<br>(0.67 to 0.91) | 0.002                 | 0.81<br>(0.69 to 0.96)   | 0.378                 |
| <b>Preeclampsia – <i>n</i> complete cases</b>             | <b>231</b>             | <b>1,152</b>                    | <b>2,415</b>         | -                      | -                     | -                        | -                     |
| Yes                                                       | 2<br>(0.9)             | 18<br>(1.6)                     | 68<br>(2.8)          | 0.53<br>(0.34 to 0.82) | 0.004                 | 0.57<br>(0.36 to 0.91)   | 0.019                 |

\* Odds ratio generated using logistic regression

† Adjusted for covariates: maternal age at delivery, maternal body mass index (pre-pregnancy), pre-pregnancy smoking (binary), smoking during pregnancy (binary), parity (0, 1, 2 or ≥3), maternal ethnicity (white or non-white), maternal education (32 weeks' gestation) and marital status

‡ Relative risk ratio generated by multinomial logistic regression

Table S18. Binge drinking and intake of additional forms of alcohol in beer ( $n=650$ ) and wine ( $n=1,383$ ) drinking groups.

|                              | Wine drinkers in pregnancy | Beer drinkers in pregnancy |
|------------------------------|----------------------------|----------------------------|
|                              | 1,383                      | 650                        |
| <b>Bingeing*</b>             |                            |                            |
| Yes, $n$ (%)                 | 380 (27.5)                 | 293 (45.1)                 |
| Missing, $n$ (%)             | 10 (0.7)                   | 7 (1.1)                    |
| <b>Other alcohol intake†</b> |                            |                            |
| Yes, $n$ (%)                 | 67 (4.8)                   | 28 (4.3)                   |
| Missing, $n$ (%)             | 229 (16.6)                 | 258 (39.7)                 |

\* Bingeing defined as drinking 4 or more drinks in one sitting

† Other alcohol intake defined as reporting intake of spirits or "other" alcohol during pregnancy

Table S19. Maternal alcohol intake and HDP excluding those who have reported diabetes, kidney disease or arthritis during pregnancy or a non-singleton pregnancy ( $n=8,152$ ) – (i) on Figure 4.

| Maternal outcome                                          | Maternal alcohol intake during pregnancy |                                 |                      | Unadjusted model       |                       | Adjusted model           |                       |
|-----------------------------------------------------------|------------------------------------------|---------------------------------|----------------------|------------------------|-----------------------|--------------------------|-----------------------|
|                                                           | Heavy<br><i>n</i> (%)                    | Low-to-moderate<br><i>n</i> (%) | None<br><i>n</i> (%) | OR*<br>(95%CI)         | <i>p</i> -value       | OR*,†<br>(95%CI)         | <i>p</i> -value       |
| <b>HDP – <i>n</i> complete cases</b>                      | <b>1,668</b>                             | <b>4,294</b>                    | <b>1,668</b>         | -                      | -                     | -                        | -                     |
| Yes                                                       | 212<br>(12.7)                            | 693<br>(16.1)                   | 411<br>(18.8)        | 0.80<br>(0.73 to 0.87) | <0.001                | 0.83<br>(0.76 to 0.91)   | <0.001                |
|                                                           |                                          |                                 |                      | <b>RR‡<br/>(95%CI)</b> | <b><i>p</i>-value</b> | <b>RR‡,‡<br/>(95%CI)</b> | <b><i>p</i>-value</b> |
| <b>Gestational hypertension – <i>n</i> complete cases</b> | <b>1,668</b>                             | <b>4,294</b>                    | <b>1,668</b>         | -                      | -                     | -                        | -                     |
| Yes                                                       | 188<br>(11.3)                            | 621<br>(14.5)                   | 357<br>(16.3)        | 0.81<br>(0.74 to 0.89) | <0.001                | 0.84<br>(0.76 to 0.93)   | <0.001                |
| <b>Preeclampsia – <i>n</i> complete cases</b>             | <b>1,668</b>                             | <b>4,294</b>                    | <b>1,668</b>         | -                      | -                     | -                        | -                     |
| Yes                                                       | 24<br>(1.4)                              | 72<br>(1.7)                     | 54<br>(2.5)          | 0.72<br>(0.57 to 0.91) | 0.007                 | 0.75<br>(0.59 to 0.96)   | 0.021                 |

\* Odds ratio generated using logistic regression

† Adjusted for covariates: maternal age at delivery, maternal body mass index (pre-pregnancy), pre-pregnancy smoking (binary), smoking during pregnancy (binary), parity (0, 1, 2 or ≥3), maternal ethnicity (white or non-white), maternal education (32 weeks' gestation) and marital status

‡ Relative risk ratio generated by multinomial logistic regression

Table S20. Maternal alcohol intake during pregnancy and HDP using a more specific categorical smoking variable ( $n=8,999$ ) – (ii) on Figure 4.

| Maternal outcome                                              | Maternal alcohol intake during pregnancy |                                 |                      | Adjusted model<br>(binary smoking during pregnancy) |                       | Adjusted model<br>(categorical smoking during pregnancy) |                       |
|---------------------------------------------------------------|------------------------------------------|---------------------------------|----------------------|-----------------------------------------------------|-----------------------|----------------------------------------------------------|-----------------------|
|                                                               | Heavy<br><i>n</i> (%)                    | Low-to-moderate<br><i>n</i> (%) | None<br><i>n</i> (%) | OR <sup>*,†</sup><br>(95%CI)                        | <i>p</i> -value       | OR <sup>*,†</sup><br>(95%CI)                             | <i>p</i> -value       |
| <b>HDP – <i>n</i> complete cases</b>                          | <b>1,888</b>                             | <b>4,696</b>                    | <b>2,415</b>         | -                                                   | -                     | -                                                        | -                     |
| Yes                                                           | 259<br>(13.7)                            | 765<br>(16.3)                   | 466<br>(19.3)        | 0.85<br>(0.78 to 0.92)                              | <0.001                | 0.85<br>(0.78 to 0.92)                                   | <0.001                |
|                                                               |                                          |                                 |                      | <b>RR<sup>†,‡</sup></b><br><b>(95%CI)</b>           | <b><i>p</i>-value</b> | <b>RR<sup>†,‡</sup></b><br><b>(95%CI)</b>                | <b><i>p</i>-value</b> |
| <b>Gestational hypertension –<br/><i>n</i> complete cases</b> | <b>1,888</b>                             | <b>4,696</b>                    | <b>2,415</b>         | -                                                   | -                     | -                                                        | -                     |
| Yes                                                           | 229<br>(12.1)                            | 681<br>(14.5)                   | 398<br>(16.5)        | 0.86<br>(0.79 to 0.94)                              | 0.001                 | 0.86<br>(0.79 to 0.94)                                   | 0.001                 |
| <b>Preeclampsia – <i>n</i> complete cases</b>                 | <b>1,888</b>                             | <b>4,696</b>                    | <b>2,415</b>         | -                                                   | -                     | -                                                        | -                     |
| Yes                                                           | 30<br>(1.6)                              | 84<br>(1.8)                     | 68<br>(2.8)          | 0.74<br>(0.59 to 0.92)                              | 0.007                 | 0.74<br>(0.59 to 0.92)                                   | 0.007                 |

\* Odds ratio generated using logistic regression

† Adjusted for covariates: maternal age at delivery, maternal body mass index (pre-pregnancy), pre-pregnancy smoking (binary), smoking during pregnancy, parity (0, 1, 2 or ≥3), maternal ethnicity (white or non-white), maternal education (32 weeks' gestation) and marital status

‡ Relative risk ratio generated by multinomial logistic regression



Table S21. Maternal alcohol intake during pregnancy and HDP excluding those who responded after 20 weeks' gestation ( $n=6,001$ ) – (iii) on Figure 4.

| Maternal outcome                                          | Maternal alcohol intake during pregnancy |                                 |                      | Unadjusted model       |                       | Adjusted model           |                       |
|-----------------------------------------------------------|------------------------------------------|---------------------------------|----------------------|------------------------|-----------------------|--------------------------|-----------------------|
|                                                           | Heavy<br><i>n</i> (%)                    | Low-to-moderate<br><i>n</i> (%) | None<br><i>n</i> (%) | OR*<br>(95%CI)         | <i>p</i> -value       | OR*,†<br>(95%CI)         | <i>p</i> -value       |
| <b>HDP</b> – <i>n</i> complete cases                      | <b>1,123</b>                             | <b>2,887</b>                    | <b>1,991</b>         | -                      | -                     | -                        | -                     |
| Yes                                                       | 156<br>(13.9)                            | 462<br>(16.0)                   | 393<br>(19.7)        | 0.80<br>(0.73 to 0.89) | <0.001                | 0.83<br>(0.75 to 0.92)   | 0.001                 |
|                                                           |                                          |                                 |                      | <b>RR‡<br/>(95%CI)</b> | <b><i>p</i>-value</b> | <b>RR‡,‡<br/>(95%CI)</b> | <b><i>p</i>-value</b> |
| <b>Gestational hypertension</b> – <i>n</i> complete cases | <b>1,123</b>                             | <b>2,887</b>                    | <b>1,991</b>         | -                      | -                     | -                        | -                     |
| Yes                                                       | 142<br>(12.6)                            | 412<br>(14.3)                   | 343<br>(17.2)        | 0.82<br>(0.74 to 0.91) | <0.001                | 0.85<br>(0.76 to 0.95)   | 0.003                 |
| <b>Preeclampsia</b> – <i>n</i> complete cases             | <b>1,123</b>                             | <b>2,887</b>                    | <b>1,991</b>         | -                      | -                     | -                        | -                     |
| Yes                                                       | 14<br>(1.3)                              | 50<br>(1.7)                     | 50<br>(2.5)          | 0.68<br>(0.51 to 0.89) | 0.005                 | 0.72<br>(0.54 to 0.95)   | 0.020                 |

\* Odds ratio generated using logistic regression

† Adjusted for covariates: maternal age at delivery, maternal body mass index (pre-pregnancy), pre-pregnancy smoking (binary), smoking during pregnancy (binary), parity (0, 1, 2 or ≥3), maternal ethnicity (white or non-white), maternal education (32 weeks' gestation) and marital status

‡ Relative risk ratio generated by multinomial logistic regression

Table S22. Maternal alcohol intake and HDP excluding abstainers prior to pregnancy ( $n=8,450$ ) – (iv) on Figure

4.

| Maternal outcome                                          | Maternal alcohol intake during pregnancy |                                 |                      | Unadjusted model       |                       | Adjusted model           |                       |
|-----------------------------------------------------------|------------------------------------------|---------------------------------|----------------------|------------------------|-----------------------|--------------------------|-----------------------|
|                                                           | Heavy<br><i>n</i> (%)                    | Low-to-moderate<br><i>n</i> (%) | None<br><i>n</i> (%) | OR*<br>(95%CI)         | <i>p</i> -value       | OR*,†<br>(95%CI)         | <i>p</i> -value       |
| <b>HDP – <i>n</i> complete cases</b>                      | <b>1,881</b>                             | <b>4,663</b>                    | <b>1,906</b>         | -                      | -                     | -                        | -                     |
| Yes                                                       | 257<br>(13.7)                            | 763<br>(16.4)                   | 375<br>(19.7)        | 0.80<br>(0.74 to 0.88) | <0.001                | 0.84<br>(0.77 to 0.92)   | <0.001                |
|                                                           |                                          |                                 |                      | <b>RR‡<br/>(95%CI)</b> | <b><i>p</i>-value</b> | <b>RR‡,‡<br/>(95%CI)</b> | <b><i>p</i>-value</b> |
| <b>Gestational hypertension – <i>n</i> complete cases</b> | <b>1,881</b>                             | <b>4,663</b>                    | <b>1,906</b>         | -                      | -                     | -                        | -                     |
| Yes                                                       | 227<br>(12.1)                            | 679<br>(14.6)                   | 321<br>(16.8)        | 0.82<br>(0.75 to 0.90) | <0.001                | 0.86<br>(0.78 to 0.94)   | 0.001                 |
| <b>Preeclampsia – <i>n</i> complete cases</b>             | <b>1,881</b>                             | <b>4,663</b>                    | <b>1,906</b>         | -                      | -                     | -                        | -                     |
| Yes                                                       | 30<br>(1.6)                              | 84<br>(1.8)                     | 54<br>(2.8)          | 0.70<br>(0.56 to 0.89) | 0.003                 | 0.76<br>(0.60 to 0.95)   | 0.019                 |

\* Odds ratio generated using logistic regression

† Adjusted for covariates: maternal age at delivery, maternal body mass index (pre-pregnancy), pre-pregnancy smoking (binary), smoking during pregnancy (binary), parity (0, 1, 2 or ≥3), maternal ethnicity (white or non-white), maternal education (≥32 weeks' gestation) and marital status

‡ Relative risk ratio generated by multinomial logistic regression
